# Supplementary material for: A modified vaccinia Ankara vaccine vector expressing a mosaic H5 hemagglutinin reduces viral shedding in rhesus macaques
Source: PLoS One. 2017 Aug 3;12(8):e0181738. doi: 10.1371/journal.pone.0181738 (PMC5542451; doi:10.1371/journal.pone.0181738)
Supplement: S1 Appendix — Raw data values used to create the figures in this manuscript are provided in this appendix. (XLSX) [file pone.0181738.s002.xlsx]

## Sheet: Sheet1
S1A BAL viral titers
	DNA Prime	DNA Prime	DNA Prime	DNA Prime	DNA Prime	DNA Prime	DNA Prime		MVA Prime	MVA Prime	MVA Prime	MVA Prime	MVA Prime	MVA Prime		Control	Control	Control	Control	Control	Control	Control	Control
Day 2	1010000	3700	121428	10	8100	214	10571		300000	6857	95714	10	4857	10		78571	72857	205000	490000	50	10	150	1160000
Day 4	133	200	1214	10	4285	20	10		37142	10	10	10	30000	10		6857	7428	52000	180000	85000	25	2930	320000
Day 7	10	10	10	10	10	10	10		10	10	10	10	10	10		10	10	10	10	10	10	10	10
S1B NW viral titers
	DNA Prime	DNA Prime	DNA Prime	DNA Prime	DNA Prime	DNA Prime	DNA Prime		MVA Prime	MVA Prime	MVA Prime	MVA Prime	MVA Prime	MVA Prime		Control	Control	Control	Control	Control	Control	Control	Control
Day 2	10	10	10	10	10	10	10		1200	10	10	10	12	10		10	10	26500	50	500	800	10	10
Day 4	10	10	10	10	75	10	10		288	10	10	10	10	10		10	10	200	10	2400	10	10	150
Day 7	57	10	10	10	10	10	10		10	10	10	10	10	10		10	10	150	150	10	10	10	10
Day 10	10	10	10	10	10	10	10		10	10	10	10	10	10		10	10	10	10	10	10	10	10
S2A ELISA Antibody binding against A/California/04/2009
	MVA Prime	MVA Prime	MVA Prime	MVA Prime	MVA Prime	MVA Prime	MVA Prime	MVA Prime	MVA Prime	MVA Prime	MVA Prime	MVA Prime		DNA Prime	DNA Prime	DNA Prime	DNA Prime	DNA Prime	DNA Prime	DNA Prime	DNA Prime	DNA Prime	DNA Prime	DNA Prime	DNA Prime	DNA Prime	DNA Prime		MVA Prime MVA Boost	MVA Prime MVA Boost	MVA Prime MVA Boost	MVA Prime MVA Boost	MVA Prime MVA Boost	MVA Prime MVA Boost	MVA Prime MVA Boost	MVA Prime MVA Boost	MVA Prime MVA Boost	MVA Prime MVA Boost	MVA Prime MVA Boost	MVA Prime MVA Boost		DNA Prime MVA Boost	DNA Prime MVA Boost	DNA Prime MVA Boost	DNA Prime MVA Boost	DNA Prime MVA Boost	DNA Prime MVA Boost	DNA Prime MVA Boost	DNA Prime MVA Boost
15	0.13	0.125	0.054	0.058	0.045	0.051	0.024	0.025	0.063	0.064	0.049	0.04		0.034	0.038	0.041	0.045	0.025	0.034	0.03	0.038	0.06	0.061	0.03	0.025	0.02	0.016		0.641	0.63	0.573	0.563	0.64	0.612	0.537	0.564	0.471	0.421	0.575	0.561		0.441	0.454	0.551	0.52	0.547	0.544	0.485	0.489
45	0.06	0.061	0.038	0.036	0.023	0.027	0.015	0.015	0.037	0.028	0.028	0.033		0.027	0.026	0.035	0.04	0.026	0.038	0.023	0.034	0.036	0.051	0.024	0.02	0.015	0.017		0.581	0.569	0.487	0.483	0.592	0.593	0.342	0.339	0.5	0.506	0.528	0.525		0.332	0.338	0.505	0.5	0.32	0.323	0.451	0.437
100
135	0.033	0.033	0.02	0.023	0.021	0.013	0.014	0.013	0.018	0.018	0.015	0.019		0.019	0.014	0.037	0.046	0.034	0.04	0.019	0.015	0.027	0.033	0.02	0.018	0.013	0.022		0.458	0.442	0.331	0.338	0.5	0.491	0.146	0.148	0.326	0.327	0.463	0.457		0.15	0.156	0.412	0.405	0.151	0.147	0.284	0.28
300
405	0.027	0.023	0.02	0.015	0.018	0.016	0.016	0.013	0.017	0.014	0.021	0.015		0.013	0.015	0.021	0.017	0.016	0.022	0.02	0.016	0.019	0.021	0.02	0.018	0.014	0.013		0.256	0.244	0.175	0.15	0.325	0.317	0.064	0.057	0.158	0.167	0.296	0.293		0.063	0.064	0.234	0.238	0.059	0.063	0.129	0.134
900
1215	0.016	0.016	0.02	0.016	0.014	0.018	0.015	0.017	0.014	0.01	0.015	0.014		0.014	0.016	0.034	0.021	0.025	0.05	0.015	0.014	0.031	0.026	0.014	0.014	0.012	0.018		0.104	0.105	0.059	0.059	0.132	0.142	0.025	0.022	0.056	0.06	0.143	0.13		0.022	0.023	0.098	0.108	0.025	0.027	0.046	0.045
2700
3645	0.018	0.019	0.021	0.018	0.019	0.018	0.018	0.018	0.021	0.01	0.024	0.017		0.013	0.013	0.039	0.035	0.02	0.038	0.017	0.018	0.023	0.016	0.023	0.014	0.015	0.014		0.041	0.036	0.025	0.02	0.053	0.059	0.019	0.015	0.028	0.026	0.056	0.05		0.011	0.013	0.043	0.047	0.011	0.015	0.019	0.019
8100
10935	0.014	0.012	0.017	0.012	0.015	0.015	0.016	0.016	0.021	0.014	0.02	0.013		0.015	0.011	0.056	0.038	0.052	0.05	0.014	0.022	0.039	0.015	0.019	0.022	0.024	0.023		0.016	0.014	0.014	0.01	0.018	0.021	0.009	0.005	0.011	0.011	0.018	0.018		0.007	0.007	0.023	0.023	0.017	0.009	0.008	0.009
24300
32805	0.016	0.013	0.017	0.016	0.017	0.021	0.018	0.019	0.02	0.015	0.018	0.015		0.017	0.011	0.057	0.097	0.069	0.059	0.015	0.018	0.028	0.024	0.013	0.015	0.021	0.034		0.009	0.009	0.009	0.01	0.017	0.018	0.013	0.012	0.01	0.01	0.017	0.014		0.011	0.013	0.021	0.019	0.013	0.015	0.009	0.009
72900
218700
S2B ELISA Antibody binding against A/Vietnam/1203/2004
	MVA Prime	MVA Prime	MVA Prime	MVA Prime	MVA Prime	MVA Prime	MVA Prime	MVA Prime	MVA Prime	MVA Prime	MVA Prime	MVA Prime		DNA Prime	DNA Prime	DNA Prime	DNA Prime	DNA Prime	DNA Prime	DNA Prime	DNA Prime	DNA Prime	DNA Prime	DNA Prime	DNA Prime	DNA Prime	DNA Prime		MVA Prime MVA Boost	MVA Prime MVA Boost	MVA Prime MVA Boost	MVA Prime MVA Boost	MVA Prime MVA Boost	MVA Prime MVA Boost	MVA Prime MVA Boost	MVA Prime MVA Boost	MVA Prime MVA Boost	MVA Prime MVA Boost	MVA Prime MVA Boost	MVA Prime MVA Boost		DNA Prime MVA Boost	DNA Prime MVA Boost	DNA Prime MVA Boost	DNA Prime MVA Boost	DNA Prime MVA Boost	DNA Prime MVA Boost	DNA Prime MVA Boost	DNA Prime MVA Boost
50	0.096	0.092	0.188	0.197	0.07	0.072	0.09	0.093	0.227	0.228	0.055	0.053		0.033	0.044	0.035	0.035	0.023	0.018	0.023	0.022	0.037	0.046	0.015	0.017	0.024	0.019		1.72	1.728	1.75	1.732	1.681	1.699	1.628	1.664	1.696	1.68	1.732	1.73		1.656	1.681	1.684	1.705	1.73	1.71	1.632	1.627
150	0.049	0.043	0.073	0.076	0.046	0.047	0.063	0.041	0.104	0.13	0.028	0.029		0.026	0.027	0.021	0.022	0.016	0.013	0.029	0.024	0.027	0.028	0.071	0.02	0.02	0.024		1.658	1.664	1.589	1.6	1.588	1.595	1.359	1.364	1.651	1.663	1.64	1.617		1.17	1.185	1.712	1.729	1.532	1.531	1.147	1.175
450	0.031	0.03	0.034	0.032	0.147	0.065	0.017	0.017	0.046	0.037	0.014	0.021		0.012	0.014	0.012	0.013	0.012	0.013	0.012	0.012	0.013	0.012	0.05	0.062	0.015	0.015		1.446	1.458	1.114	1.161	1.324	1.315	0.764	0.763	1.425	1.443	1.319	1.294		0.596	0.59	1.633	1.649	0.985	0.986	0.626	0.633
1350	0.024	0.022	0.023	0.028	0.035	0.05	0.05	0.039	0.028	0.025	0.016	0.018		0.015	0.018	0.013	0.016	0.02	0.02	0.013	0.015	0.018	0.02	0.013	0.066	0.015	0.02		0.845	0.891	0.539	0.565	0.736	0.725	0.335	0.337	0.825	0.849	0.726	0.692		0.273	0.279	1.237	1.253	0.452	0.448	0.273	0.296
4050	0.016	0.019	0.016	0.02	0.036	0.021	0.011	0.016	0.021	0.074	0.034	0.013		0.012	0.016	0.009	0.01	0.017	0.01	0.014	0.023	0.022	0.019	0.032	0.015	0.017	0.028		0.373	0.381	0.243	0.24	0.316	0.317	0.142	0.144	0.36	0.384	0.319	0.323		0.137	0.163	0.609	0.632	0.183	0.186	0.14	0.176
12150	0.016	0.022	0.007	0.008	0.027	0.077	0.017	0.016	0.025	0.02	0.007	0.007		0.008	0.008	0.012	0.008	0.016	0.012	0.015	0.018	0.021	0.021	0.036	0.021	0.025	0.021		0.152	0.164	0.114	0.112	0.157	0.153	0.071	0.068	0.151	0.161	0.191	0.138		0.147	0.088	0.256	0.262	0.076	0.083	0.148	0.15
36450	0.013	0.014	0.009	0.01	0.014	0.021	0.01	0.034	0.026	0.015	0.006	0.006		0.01	0.007	0.009	0.01	0.017	0.019	0.01	0.01	0.008	0.011	0.022	0.051	0.011	0.018		0.071	0.068	0.051	0.048	0.058	0.061	0.03	0.032	0.068	0.073	0.084	0.061		0.087	0.128	0.104	0.108	0.035	0.036	0.101	0.064
109350	0.007	0.008	0.01	0.012	0.054	0.046	0.02	0.019	0.047	0.018	0.009	0.01		0.011	0.009	0.015	0.012	0.019	0.013	0.012	0.013	0.014	0.017	0.012	0.076	0.023	0.019		0.034	0.033	0.027	0.031	0.04	0.04	0.026	0.022	0.034	0.033	0.05	0.04		0.1	0.081	0.045	0.045	0.023	0.021	0.072	0.113
100
300
900
2700
8100
24300
72900
218700
S3A HI Antibody binding against A/California/04/2009
	DNA Prime MVA Boost	DNA Prime MVA Boost	DNA Prime MVA Boost	DNA Prime MVA Boost	DNA Prime MVA Boost	DNA Prime MVA Boost	DNA Prime MVA Boost		MVA Prime MVA Boost	MVA Prime MVA Boost	MVA Prime MVA Boost	MVA Prime MVA Boost	MVA Prime MVA Boost	MVA Prime MVA Boost		Control	Control
7 days post prime	4	4	4	4	4	4	4		4	4	4	4	4	4		4	4
14 days post boost	4	4	4	4	4	4	4		4	4	4	4	4	4		4	4
30 days post challenge	1024	256	1024	512	1024	512	256		1024	256	512	512	1024	512		512	512
S3B HI Antibody binding against A/Vietnam/1203/2004
	DNA Prime MVA Boost	DNA Prime MVA Boost	DNA Prime MVA Boost	DNA Prime MVA Boost	DNA Prime MVA Boost	DNA Prime MVA Boost	DNA Prime MVA Boost		MVA Prime MVA Boost	MVA Prime MVA Boost	MVA Prime MVA Boost	MVA Prime MVA Boost	MVA Prime MVA Boost	MVA Prime MVA Boost		Control	Control
7 days post prime	32	16	16	32	16	16	32		32	32	16	16	16	32		4	4
14 days post boost	128	64	64	128	128	128	256		128	128	128	128	128	256		4	4
30 days post challenge	128	64	64	128	128	128	192		128	128	128	128	128	192		4	4
S3C Plaque Reduction Neutralization Test against A/California/04/2009
	DNA Prime MVA Boost	DNA Prime MVA Boost	DNA Prime MVA Boost	DNA Prime MVA Boost	DNA Prime MVA Boost	DNA Prime MVA Boost	DNA Prime MVA Boost		MVA Prime MVA Boost	MVA Prime MVA Boost	MVA Prime MVA Boost	MVA Prime MVA Boost	MVA Prime MVA Boost	MVA Prime MVA Boost		Control	Control
14 days post-boost	150	50	150	50	50	50	50		150	150	50	150	50	50		150	50
4 days post-challenge	150	150	150	150	150	150	150		50	150	150	150	50	50		50	50
14 days post-challenge	1.8	5.5	1.8	5.5	5.5	1.8	1.8		1.8	5.5	1.8	1.8	1.8	1.8		1.8	1.8
S4 % NK degranulating against A/Califorina/04/2009
	DNA Prime MVA Boost	DNA Prime MVA Boost	DNA Prime MVA Boost	DNA Prime MVA Boost	DNA Prime MVA Boost	DNA Prime MVA Boost	DNA Prime MVA Boost		MVA Prime MVA Boost	MVA Prime MVA Boost	MVA Prime MVA Boost	MVA Prime MVA Boost	MVA Prime MVA Boost	MVA Prime MVA Boost		Control	Control
2 weeks post boost	0.7288	0.7011	0.4286	0.7443	0.6514	0.6817	0.6646		0.6494	0.6137	0.6765	0.6684	0.5103	0.5254		0.0651	0.1314
day of challenge	0.0029	0.0198	0.0289	0.0781	0.4432	0.2157	0.2884		0.5143	0.2008	0.114	0.2818	0.0135	0.0581		0.0033	0.0049
2 days post challenge	0.1693	0.1197	0.0952	0.1769	0.4699	0.2434	0.3171		0.5638	0.2816	0.1342	0.3251	0.0332	0.079		0.014	0.0191
4 days post challenge	0.208	0.0477	0.0566	0.1151	0.4084	0.199	0.2448		0.4784	0.1397	0.0788	0.2081	0.0141	0.048		0.006	0.0047
7 days post challenge	0.5037	0.2353	0.1981	0.2218	0.2288	0.2598	0.2556		0.1813	0.2502	0.2069	0.1334	0.1919	0.1638		0.0088	-0.06
S5A Ellispot 7 days post prime
	DNA Prime MVA Boost	DNA Prime MVA Boost	DNA Prime MVA Boost	DNA Prime MVA Boost	DNA Prime MVA Boost	DNA Prime MVA Boost	DNA Prime MVA Boost		MVA Prime MVA Boost	MVA Prime MVA Boost	MVA Prime MVA Boost	MVA Prime MVA Boost	MVA Prime MVA Boost	MVA Prime MVA Boost		Control	Control
HA pool 1	0.5	0	0.5	0	0.5	4.5	1		9.5	0	6	0	0	0		0	0
HA pool 2	4	6	2	3	4	6.5	13.5		2	0	0.5	0	0	5.5		0	0
HA pool 3	0	0.5	0.5	1.5	3	1.5	0		2	0	1	0.5	0	0		0	0
HA pool 4	2.5	0	0	0	5.5	2.5	0		0	0	0	0.5	0	0		0	0
HA pool 5	0	0	0.5	4.5	0.5	0	0		0.5	0	0.5	0	0	0		0	0.5
HA pool 6	2	8.5	0	1	4	0	0		8.5	0	0	2	0	3		0	0
HA pool 7	0.5	0	0.5	2.5	3.5	6.5	9.5		5	0	0.5	0	0	0		0	1.5
S5B Ellispot 14 days post boost
	DNA Prime MVA Boost	DNA Prime MVA Boost	DNA Prime MVA Boost	DNA Prime MVA Boost	DNA Prime MVA Boost	DNA Prime MVA Boost	DNA Prime MVA Boost		MVA Prime MVA Boost	MVA Prime MVA Boost	MVA Prime MVA Boost	MVA Prime MVA Boost	MVA Prime MVA Boost	MVA Prime MVA Boost		Control	Control
HA pool 1	0.5	0	0	0.5	0	0	0.5		1.5	0	11.5	1.5	2	0		0	0
HA pool 2	18	2	0	3	2	1	8		0	0	0	1.5	0	18		0	1
HA pool 3	2	1	0	0	0	0	0		0	0	0	0	0	0		0	0
HA pool 4	2.5	0	0	0	0	0.5	2		1.5	4	0	0.5	1.5	4		0	0
HA pool 5	0.5	0	0.5	2	0	0	0.5		0	0	0	1	0	0		0	0
HA pool 6	1.5	11	1	1.5	9	1	2		0	0	0	0.5	2.5	11.5		0	0
HA pool 7	1	0	0	0.5	0	0.5	0		0	0	0	0	0	2.5		0	0
S5C Ellispot 7 days post challenge
	DNA Prime MVA Boost	DNA Prime MVA Boost	DNA Prime MVA Boost	DNA Prime MVA Boost	DNA Prime MVA Boost	DNA Prime MVA Boost	DNA Prime MVA Boost		MVA Prime MVA Boost	MVA Prime MVA Boost	MVA Prime MVA Boost	MVA Prime MVA Boost	MVA Prime MVA Boost	MVA Prime MVA Boost		Control	Control
HA pool 1	0.5	1	3.5	0	0	2.5	12.5		0	0	11.5	6	7	15		0	0.5
HA pool 2	4.5	14.5	10.5	14.5	15	6	24		39.5	0	23.5	11	15.5	15		1.5	4
HA pool 3	6.5	7.5	1	112.5	24.5	40	34		52.5	9	7.5	100.5	24	0.5		22	9.5
HA pool 4	70.5	2	11	4.5	0	3.5	52		0	0	9.5	0.5	6.5	0		0	8
HA pool 5	2	17.5	23.5	19.5	8.5	6	183		26	0	73.5	4.5	19	0		0.5	8.5
HA pool 6	10.5	253.5	14	162.5	394	38.5	215.5		386.5	43	13.5	12	16.5	35		5	0
HA pool 7	0	7.5	0.5	4.5	3.5	1.5	4		0.5	0	245	23	8	31.5		0	5
SS1A	MVA prime - day of vaccination							DNA prime - day of vaccination							MVA prime - day of challenge							DNA prime - day of challenge							control - day of vaccination							control - day of challenge
100	0.027	0.012	0.0055	0.017	0.0045	0.004		0.018	0.0145	0.012	0.008	0.016	0.0495	0.03	0.835	0.392	0.6765	0.117	0.455	0.9905		0.182	0.098	0.173	0.146	0.381	0.1115	0.247	0.0305	0.008						0.0485	0.02
300	0.0215	0.0085	0.008	0.0085	0.0035	0.0035		0.014	0.0105	0.0145	0.011	0.011	0.0235	0.0285	0.264	0.127	0.2655	0.05	0.164	0.4175		0.0805	0.0495	0.07	0.065	0.1715	0.052	0.0985	0.0165	0.0065						0.024	0.0175
900	0.008	0.0065	0.007	0.0155	0.0085	0.006		0.01	0.0115	0.012	0.01	0.01	0.0145	0.015	0.1065	0.0585	0.0985	0.0255	0.0635	0.1515		0.0375	0.026	0.032	0.034	0.069	0.027	0.0395	0.0125	0.0065						0.0195	0.014
2700	0.007	0.006	0.0065	0.008	0.0025	0.004		0.01	0.0095	0.0105	0.009	0.009	0.0105	0.0105	0.045	0.029	0.0425	0.0175	0.0305	0.0635		0.02	0.0215	0.022	0.019	0.0305	0.019	0.025	0.01	0.004						0.014	0.0135
8100	0.006	0.0065	0.0075	0.0045	0.0035	0.0045		0.0115	0.0385	0.011	0.0105	0.0085	0.0095	0.01	0.023	0.016	0.0215	0.0145	0.017	0.028		0.0165	0.0145	0.014	0.015	0.018	0.0135	0.0165	0.009	0.0055						0.013	0.0125
24300	0.007	0.0065	0.0075	0.0045	0.002	0.0055		0.009	0.009	0.0095	0.009	0.008	0.008	0.008	0.017	0.015	0.0175	0.014	0.0125	0.02		0.014	0.015	0.0165	0.014	0.0115	0.048	0.017	0.009	0.006						0.0115	0.0135
SS1B	MVA prime - day of vaccination							DNA prime - day of vaccination							MVA prime - day of challenge							DNA prime - day of challenge							control - day of vaccination							control - day of challenge
100	0.013	0.0155	0.0165	0.0095	0.0245	0.026		0.0095	0.012	0.0145	0.008	0.005	0.015	0.012															0.007	0.015
300	0.019	0.0015	0.0015	0.0045	0.009	0.011		0.013	0.0125	0.015	0.007	0.01	0.0175	0.015	1.725	1.293	1.7795	0.746	1.5905	1.5265		1.6915	1.4195	1.482	1.3825	1.406	0.807	0.622	0.007	0.002						0.0115	0.012
900	0.0035	0.0015	0.003	0.004	0.005	0.006		0.013	0.0175	0.013	0.0085	0.0105	0.0155	0.016	1.2585	0.6025	1.262	0.3085	0.8965	0.8625		0.937	0.6965	0.7285	0.6835	0.6975	0.3315	0.243	0.0075	0.003						0.0075	0.0125
2700	0.0075	0.0015	0.001	0.009	0.005	0.0055		0.0125	0.0155	0.0145	0.01	0.006	0.008	0.007	0.724	0.255	0.668	0.1395	0.42	0.369		0.3965	0.326	0.311	0.285	0.313	0.1405	0.0995	0.0065	0.002						0.008	0.0135
8100	0.004	0.002	0.002	0.0015	0.003	0.0065		0.013	0.019	0.0135	0.0065	0.011	0.011	0.005	0.3015	0.115	0.2885	0.0485	0.2035	0.1555		0.2065	0.115	0.1265	0.122	0.1225	0.051	0.0395	0.007	0.0035						0.0085	0.0145
24300	0.0085	0.0035	0.0025	0.007	0.0105	0.006		0.0115	0.016	0.0125	0.007	0.01	0.008	0.006	0.1215	0.0455	0.124	0.026	0.124	0.071		0.0735	0.047	0.0505	0.049	0.05	0.0235	0.0195	0.004	0.002						0.0085	0.016
72900															0.053	0.0225	0.051	0.0145	0.017	0.01		0.036	0.023	0.0225	0.023	0.0225	0.013	0.012								0.008	0.0095
SS1C	DNA Prime / MVA Boost								MVA Prime / MVA Boost								Control
before vaccination	10	10	10	10	10	10	10		10	10	10	10	10	10			10	10
day of challenge	10	10	10	10	10	10	10		10	10	10	10	10	10			10	10
SS1D	DNA Prime / MVA Boost								MVA Prime / MVA Boost								Control
before vaccination	10	10	10	10	10	10	10		10	10	10	10	10	10			10	10
day of challenge	160	80	160	160	160	80	160		160	160	80	160	160	160			10	10
[truncated: 32 more columns]
